# Supplementary material
Source: PubMed Central journal article supplement (PMC2729012)
Supplement: 0906549106_0906549106SI.pdf [file 0906549106_0906549106SI.pdf]

# Supporting Information

Chan et al. 10.1073/pnas.0906549106

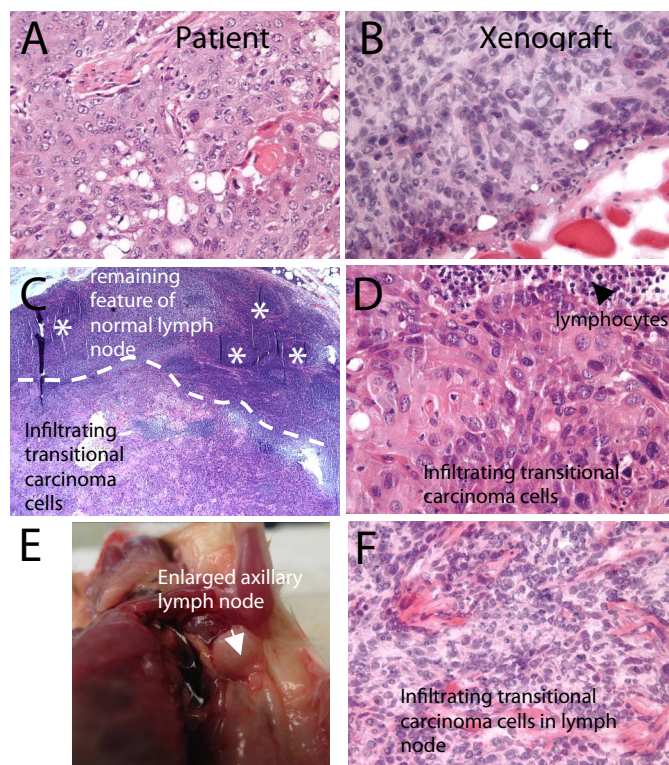

**Fig. S1.** Histological analysis of representative bladder cancer (BC-8; pT3a pN1 pMX) and serially derived xenograft tumor and lymph node metastasis. (A) H&E staining of primary bladder cancer sample (BC-8). (B) H&E staining of xenograft tumor formed from BC-8. (C and D) H&E staining of lymph node from BC-8 that was infiltrated with transitional carcinoma cells (asterisks in C). (E) Photograph showing an enlarged axillary lymph node (arrow) in *RAG2*<sup>-/-</sup> mice that was engrafted with transitional carcinoma cells from BC-8. (F) H&E staining of axillary lymph node from mouse showing typical histology of transitional cells.

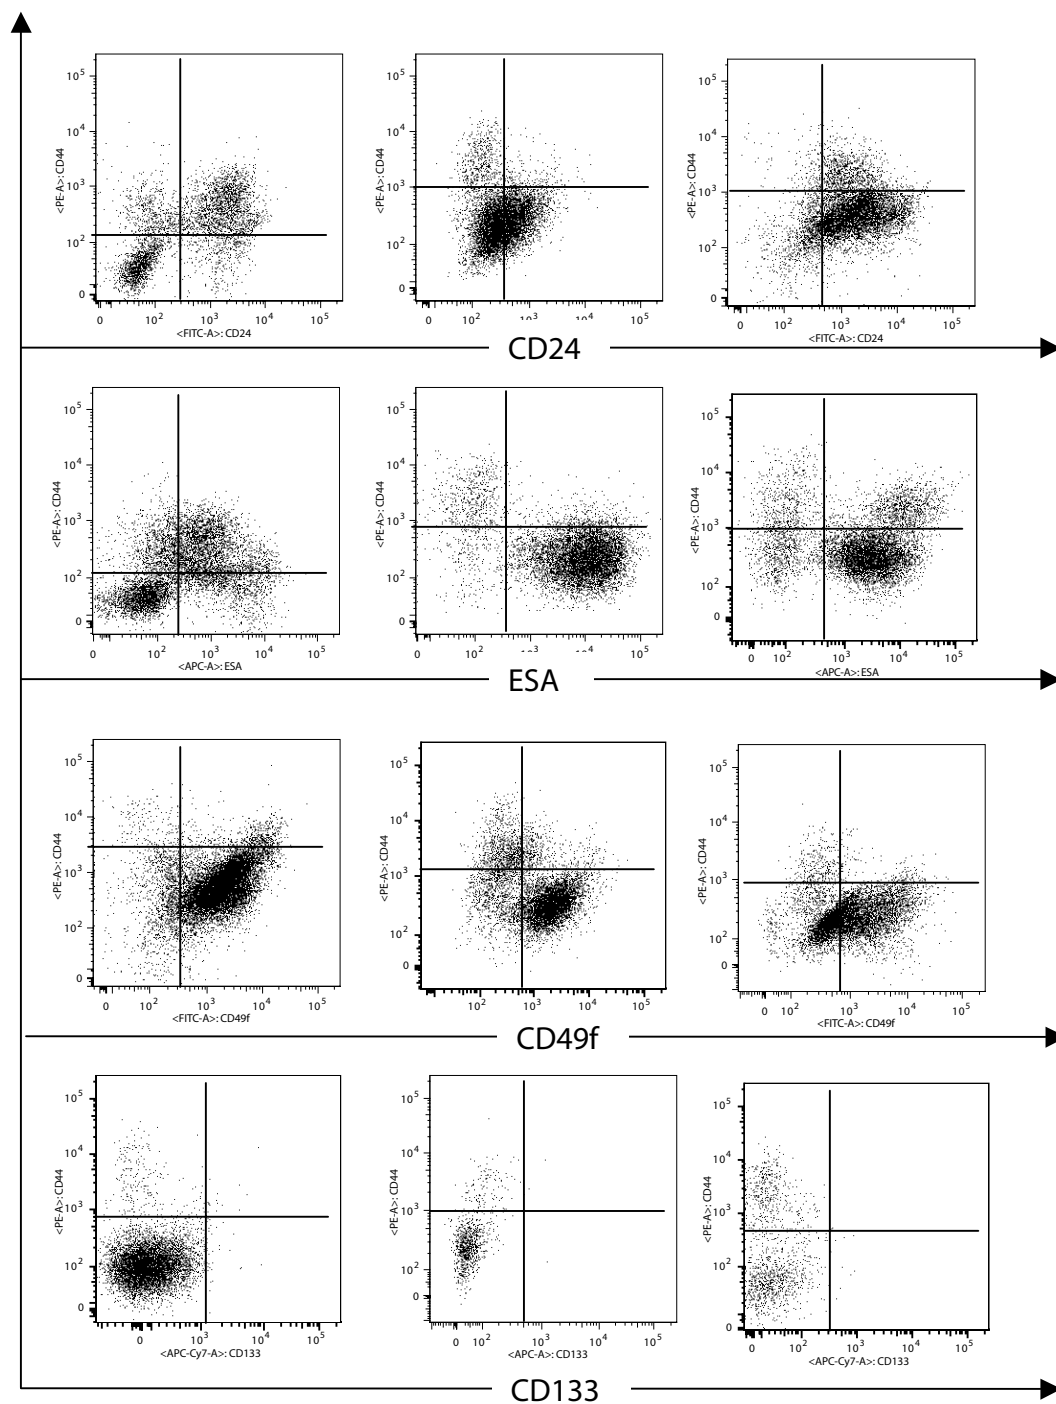

**Fig. S2.** Flow cytometry analysis of stem cell-related cell-surface markers. Bladder tumors were enzymatically dissociated into cell suspensions and analyzed by FACS (Becton Dickinson). Infiltrating hematopoietic cells (CD45<sup>+</sup>) and endothelial cells (CD31<sup>+</sup>) were excluded, and the relative expression of CD44, CD24, ESA, CD49f, and CD133 from representative bladder tumors is shown.

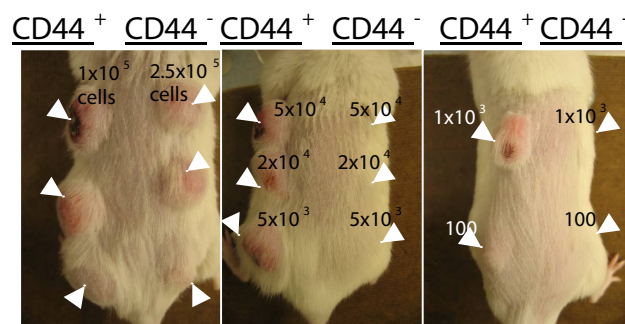

**Fig. S3.** Representative photographs demonstrating the engraftment of tumors (*arrowheads*). Bladder tumor cell subpopulations (CD44<sup>+</sup>/CD44<sup>-</sup>) in limiting dilutions were injected intradermally into *RAG2*<sup>-</sup>/ $\gamma$ *c*<sup>-</sup> mice.

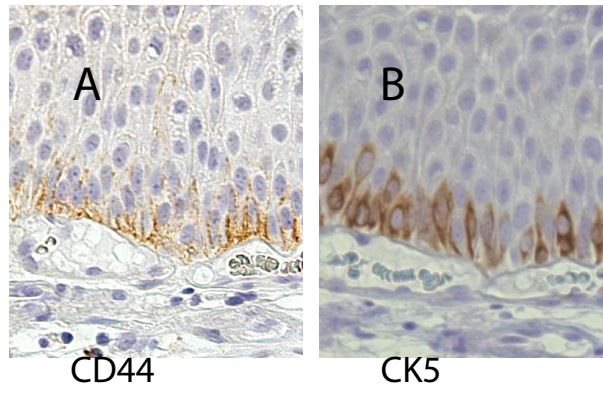

**Fig. S4.** Immunohistochemical analysis of (A) CD44 and (B) CK5 in normal human urothelium. Brown color indicates positive staining.

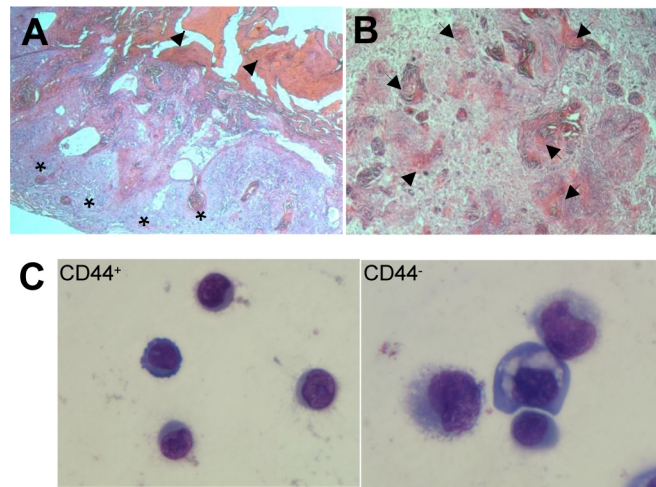

**Fig. S5.** (A) Hematoxylin and Eosin (H&E) staining of a representative xenograft tumor formed from patient CD44<sup>+</sup> tumor cells. Tumor comprises areas with less differentiated (indicated by \*) and terminally differentiated tumor cells (indicated by arrows). (B) H&E staining of a representative xenograft tumor formed from patient CD44<sup>-</sup> tumor cells, comprising of highly keratinized, terminally differentiated cells (indicated by arrows). (C) Giemsa-Wright staining showing the cellular morphology of fractionated CD44<sup>+</sup> and CD4<sup>-</sup> tumor cells from representative bladder cancer (BC-3).

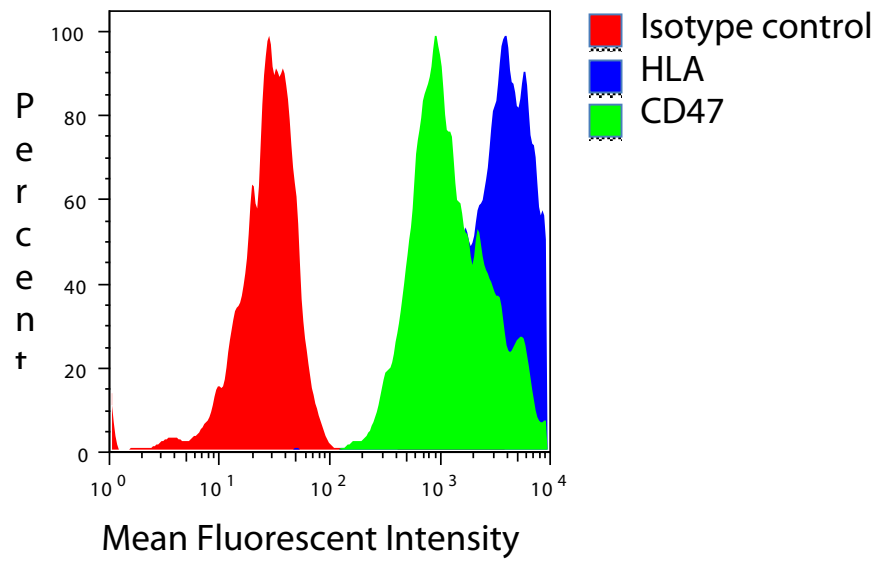

**Fig. S6.** Flow cytometry analysis of a representative human bladder cancer (BC-8) demonstrating the binding of CD47 and HLA antibodies to bladder cancer cells over isotype control.

| Patient identifier | TNM staging  | % CD44 <sup>+</sup> cells | Tumor engraftment in vivo | Serially transplantable tumor in vivo |
|--------------------|--------------|---------------------------|---------------------------|---------------------------------------|
| BC-12              | pT3b pN2 pMX | 34.5                      | Yes                       | No                                    |
| BC-1               | pT3b pN0 pMX | 7.8                       | Yes                       | Yes                                   |
| BC-2               | pT3a pN2 pMX | 3.06                      | No                        | No                                    |
| BC-8               | pT3a pN1 pMX | 6.03                      | Yes                       | Yes                                   |
| BC-11              | pT3a pN0 pMX | 27.9                      | Yes                       | No                                    |
| BC-9               | pT3a pN0 pMX | 24.5                      | No                        | No                                    |
| BC-5               | pT2b pN0 pMX | 36.3                      | No                        | No                                    |
| BC-7               | pT2b pN0 pMX | 6.5                       | No                        | No                                    |
| BC-6               | pT2a pN0 pMX | 8.9                       | Yes                       | No                                    |
| BC-4               | pT2a pN0 pMX | 0                         | No                        | No                                    |
| BC-10              | pT2a pNX pMX | 3.4                       | No                        | No                                    |
| BC-14              | pTa pN0 pMX  | 7.8                       | No                        | No                                    |
| BC-13              | pTis pN0 pMX | 5.48                      | No                        | No                                    |
| BC-3               | N/A          | 4.8                       | No                        | No                                    |

Bladder cancer TNM stages ranked from highest to lowest according to the ability of tumor cells to form xenograft tumors in *RAG2*<sup>-/-</sup>  $\gamma$  c<sup>-</sup> mice. Of 14 freshly isolated bladder cancers collected, 12 were muscle invasive (pT2 and pT3 stage), 1 was a carcinoma in situ (pTis), and for 1 tumor clinical information was lacking. Four of 6 pT3-stage tumors engrafted, 1 of 5 pT2-stage tumors engrafted, and no tumor below pTa stage engrafted. Two tumors were serially transplantable in vivo, both of which were at pT3 stages.

**Table S2. Percentage of tumor cells co-expressing CD44 and K5 or K20**

| Marker expression                  | % cells |
|------------------------------------|---------|
| CD44 <sup>+</sup> K5 <sup>+</sup>  | 37      |
| CD44 <sup>+</sup> K5 <sup>-</sup>  | 7       |
| CD44 <sup>-</sup> K5 <sup>+</sup>  | 10      |
| CD44 <sup>-</sup> K5 <sup>-</sup>  | 46      |
| CD44 <sup>+</sup> K20 <sup>+</sup> | 3       |
| CD44 <sup>+</sup> K20 <sup>-</sup> | 39      |
| CD44 <sup>-</sup> K20 <sup>+</sup> | 28      |
| CD44 <sup>-</sup> K20 <sup>-</sup> | 30      |

Percentage of bladder tumor cells co-expressing CD44 and/or cytokeratin 5/20. Bladder xenograft tumors ( $n = 4$ ) were analyzed for the percentage of cells expressing or co-expressing the markers CD44, CK5, and CK20 by immunofluorescence staining.
